# Supplementary material for: The Over-Expression of E2F3 Might Serve as Prognostic Marker for Neuroblastoma Patients with Stage 4S Disease
Source: MDPI journal article supplement (doi:10.3390/diagnostics10050315), 2020-05-16
Supplement: s1 [file s1]

# The over-expression of *E2F3* might serve as prognostic marker for neuroblastoma patients with stage 4S disease

## Supplemental Material

**Figure S1.** Event Free Survival of Stage 4S Neuroblastoma patients in relation to the expression of *RB1* gene in four microarray databases; cut-off value based on the median of gene expression (red line: lower values; blue line: higher values).

Panel A: Kocak-649 data set; panel B: Oberthuer-251 data set; panel C: SEQC dataset, RPM platform; Panel D: SEQC data set, custom platform.

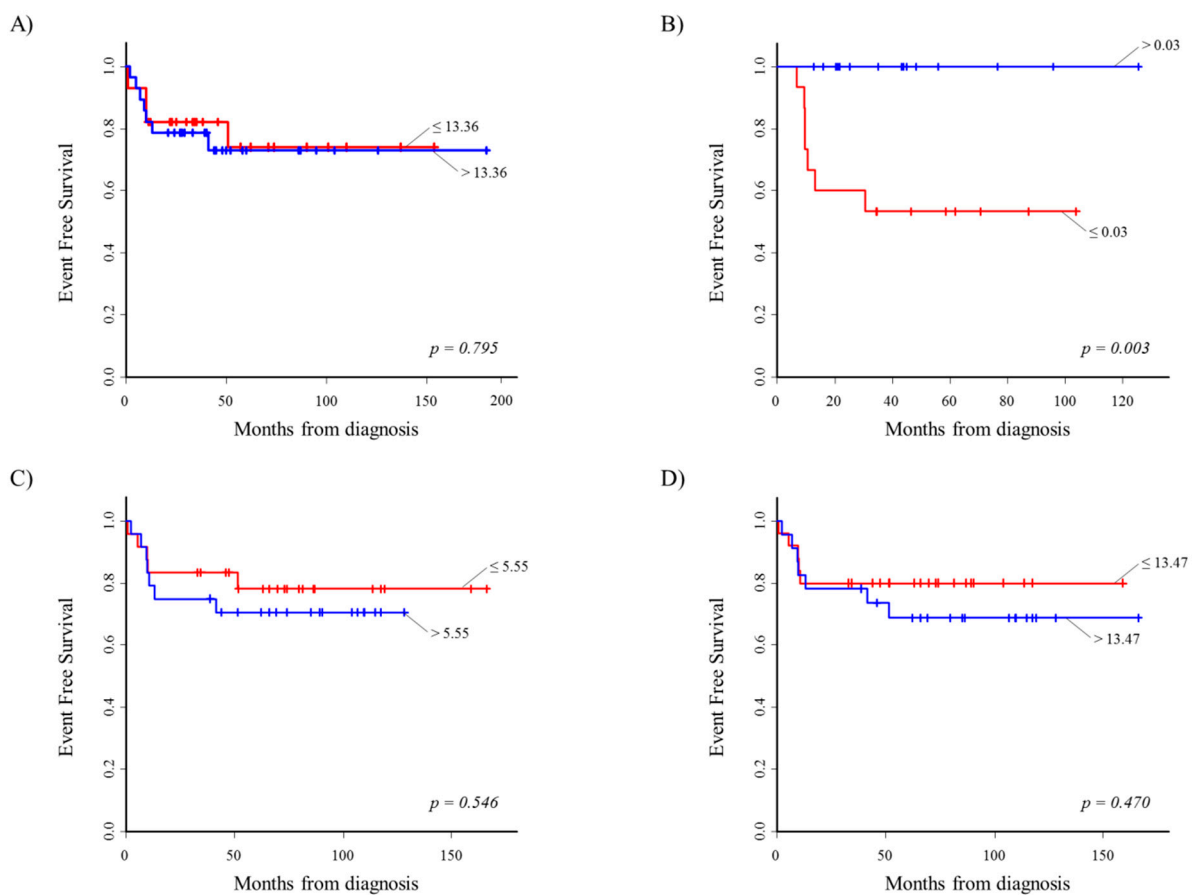

**Figure S2.** Event Free Survival of Stage 4S Neuroblastoma patients in relation to the expression of *RB1* gene in four microarray databases; cut-off value based on the first tertile of gene expression (red line: lower values; blue line: higher values).

Panel A: Kocak-649 data set; panel B: Oberthuer-251 data set; panel C: SEQC dataset, RPM platform; Panel D: SEQC data set, custom platform.

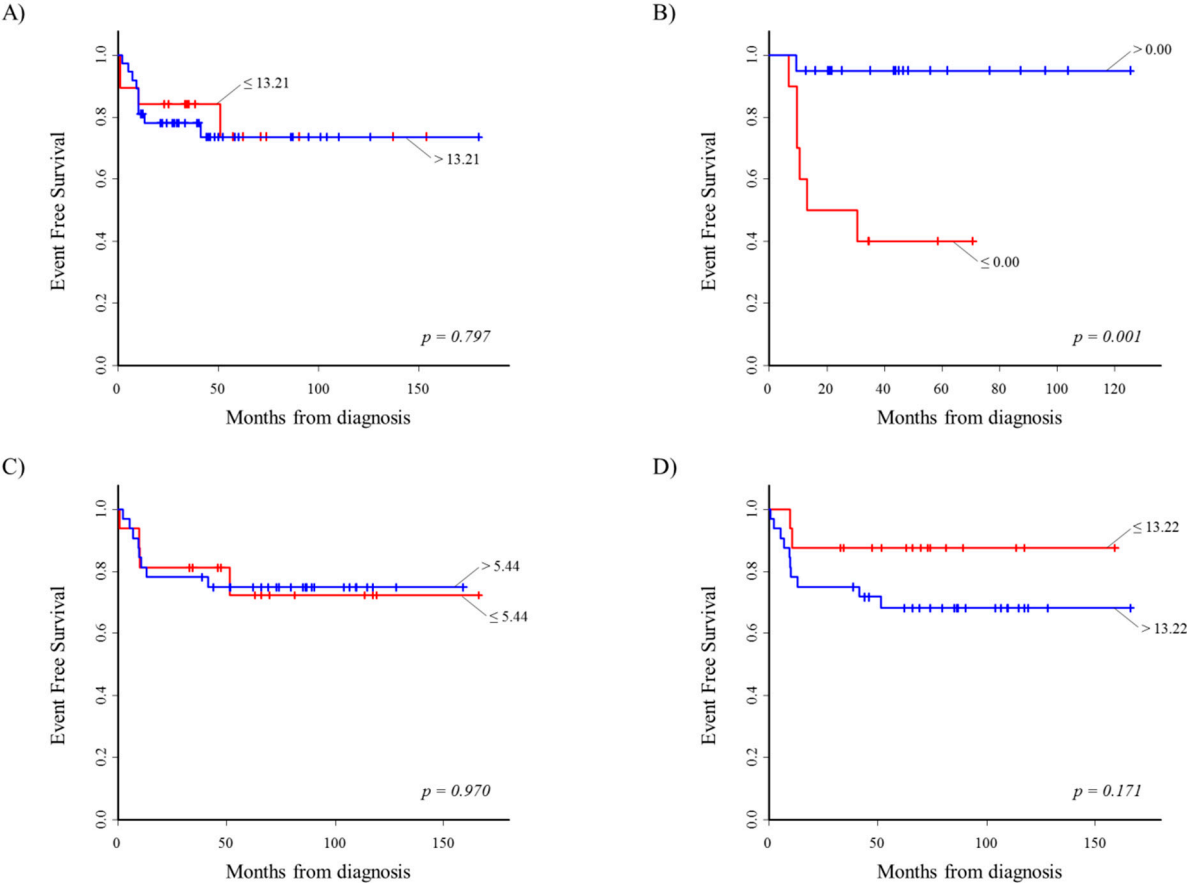

**Figure S3.** Event Free Survival of Stage 4S Neuroblastoma patients in relation to the expression of *RB1* gene in four microarray databases; cut-off value based on the last tertile of gene expression (red line: lower values; blue line: higher values).

Panel A: Kocak-649 data set; panel B: Oberthuer-251 data set; panel C: SEQC dataset, RPM platform; Panel D: SEQC data set, custom platform.

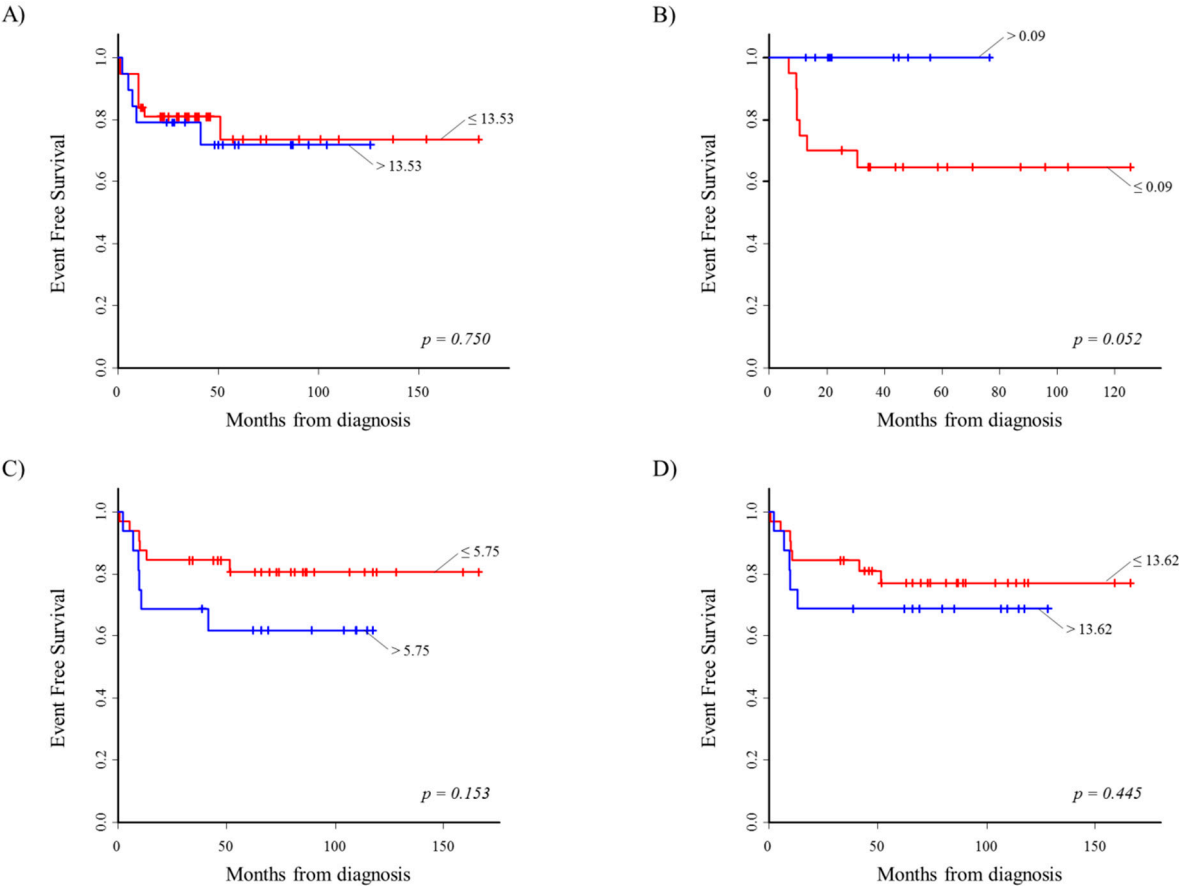

**Figure S4.** Forest plot of hazard ratios for the association between Event Free Survival of patients with Stage 4S Neuroblastoma and *RB1* gene expression at the following selected cut-offs: A) first tertile; B) median; C) last tertile.

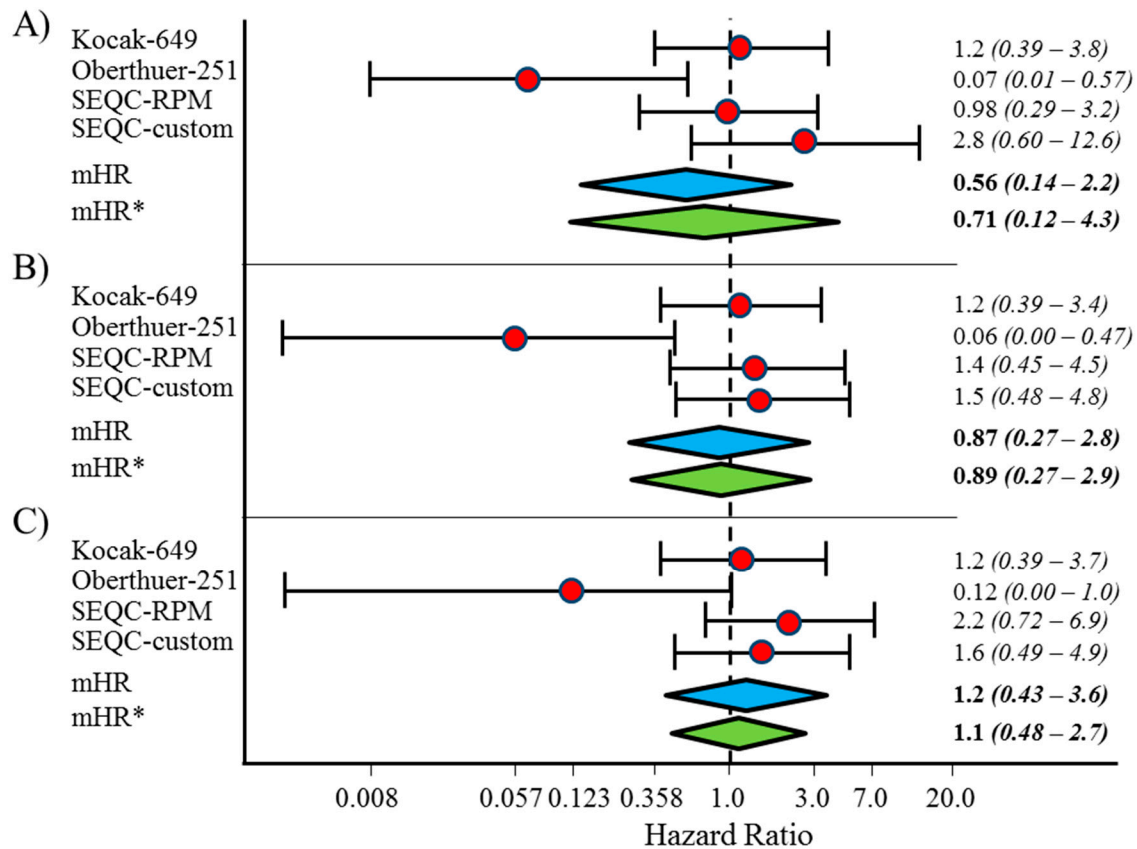

mHR: meta-analytic random effect estimates of Hazard Ratio based on Kocak, Oberthuer and SEQC RPM data sets. mHR\*: meta-analytic random effect estimates of Hazard Ratio based on Kocak, Oberthuer and SEQC Custom data sets.

**Figure S5.** Event Free Survival of Stage 4S Neuroblastoma patients in relation to the expression of TERT gene in four microarray databases; cut-off value based on the median of gene expression (red line: lower values; blue line: higher values).

Panel A: Kocak-649 data set; panel B: Oberthuer-251 data set; panel C: SEQC dataset, RPM platform; Panel D: SEQC data set, custom platform.

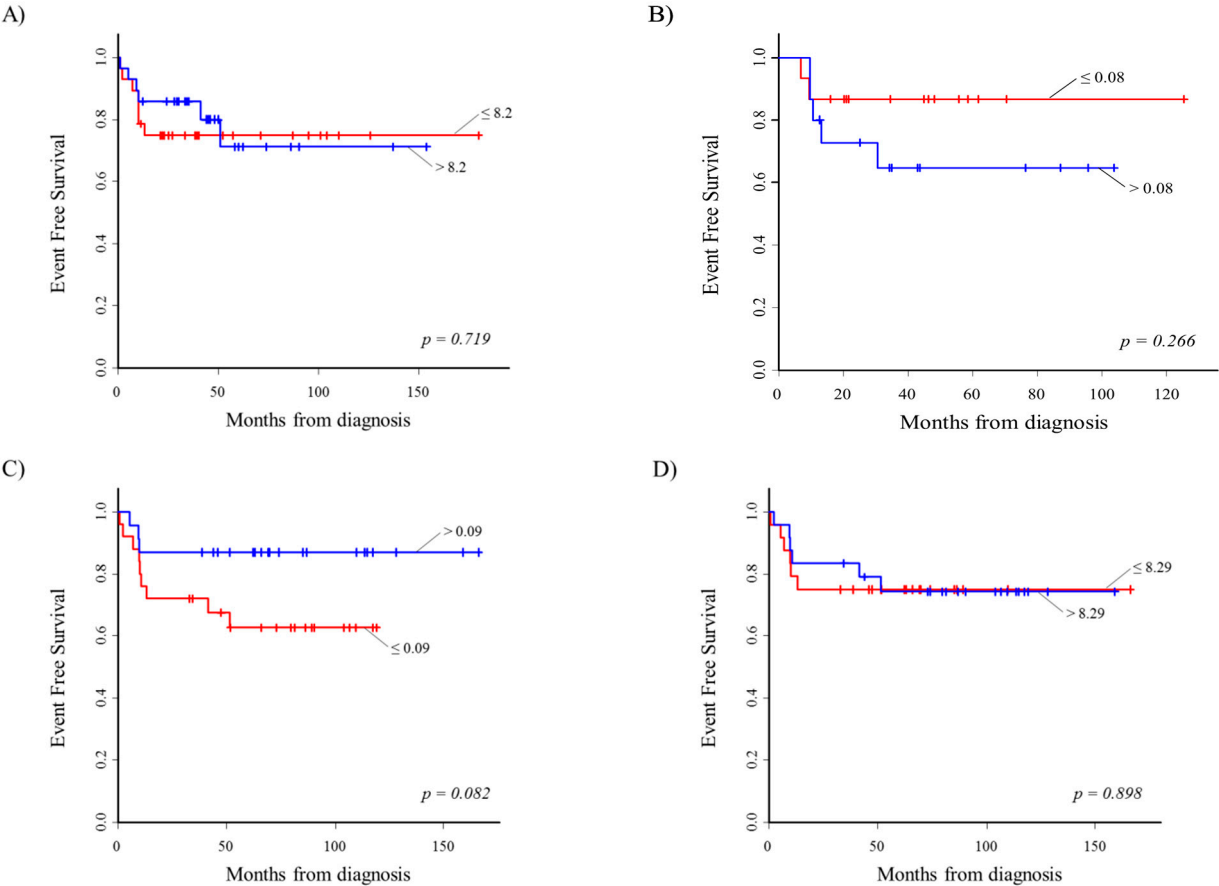

**Figure S6.** Event Free Survival of Stage 4S Neuroblastoma patients in relation to the expression of *TERT* gene in four microarray databases; cut-off value based on the first tertile of gene expression (red line: lower values; blue line: higher values).

Panel A: Kocak-649 data set; panel B: Oberthuer-251 data set; panel C: SEQC dataset, RPM platform; Panel D: SEQC data set, custom platform.

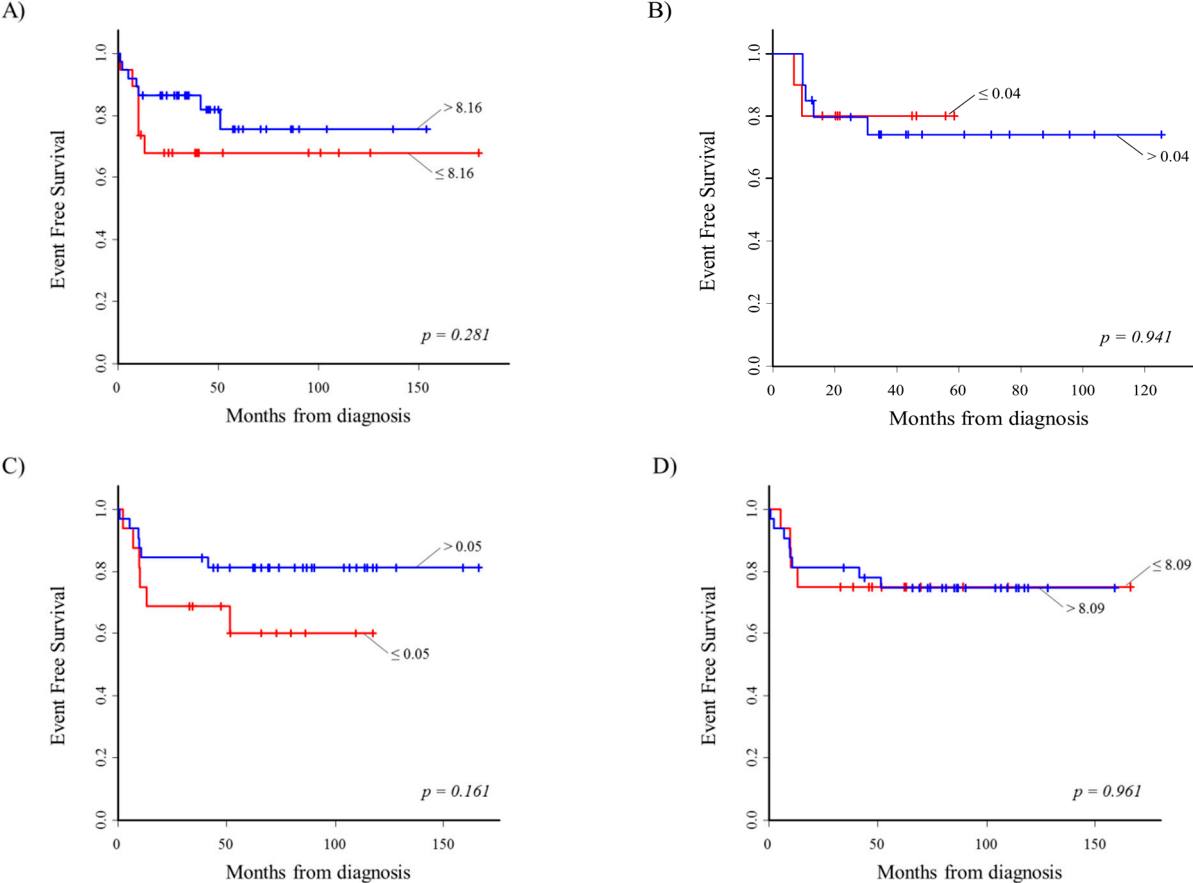

**Figure S7.** Event Free Survival of Stage 4S Neuroblastoma patients in relation to the expression of *TERT* gene in four microarray databases; cut-off value based on the last tertile of gene expression (red line: lower values; blue line: higher values).

Panel A: Kocak-649 data set; panel B: Oberthuer-251 data set; panel C: SEQC dataset, RPM platform; Panel D: SEQC data set, custom platform.

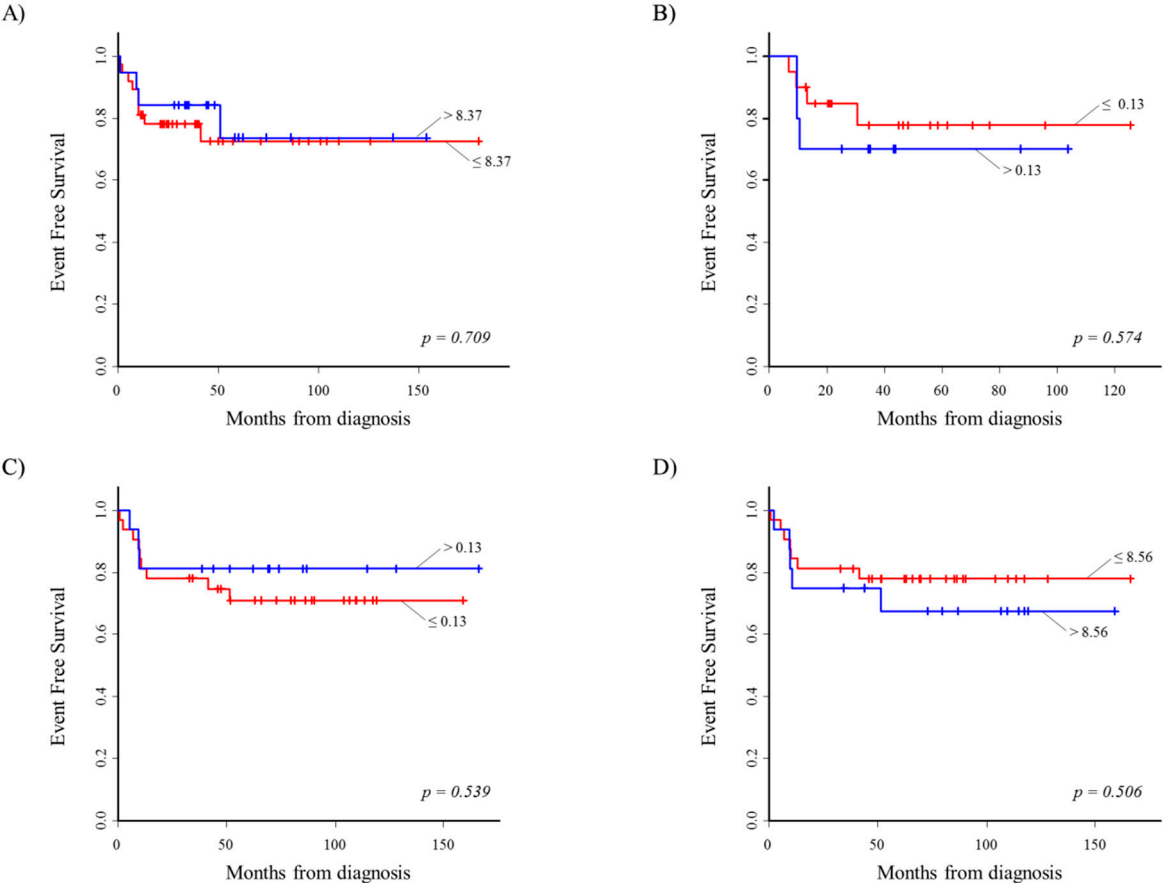

**Figure S8.** Forest plot of hazard ratios for the association between Event Free Survival of patients with Stage 4S Neuroblastoma and *TERT* gene expression at the following selected cut-offs: A) first tertile; B) median; C) last tertile.

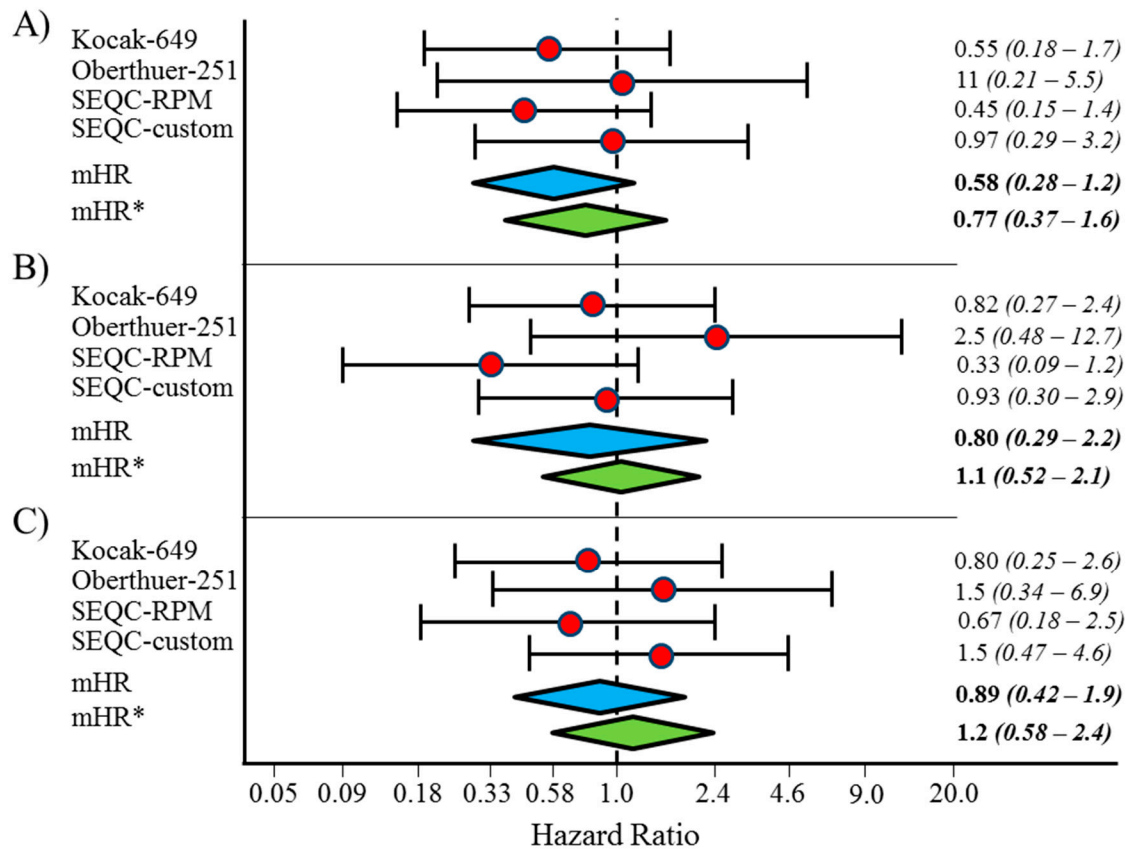

mHR: meta-analytic random effect estimates of Hazard Ratio based on Kocak, Oberthuer and SEQC RPM data sets. mHR\*: meta-analytic random effect estimates of Hazard Ratio based on Kocak, Oberthuer and SEQC Custom data sets.

**Figure S9.** Event Free Survival of Stage 4S Neuroblastoma patients in relation to the expression of *E2F1* gene in four microarray databases; cut-off value based on the median of gene expression (red line: lower values; blue line: higher values).

Panel A: Kocak-649 data set; panel B: Oberthuer-251 data set; panel C: SEQC dataset, RPM platform; Panel D: SEQC data set, custom platform.

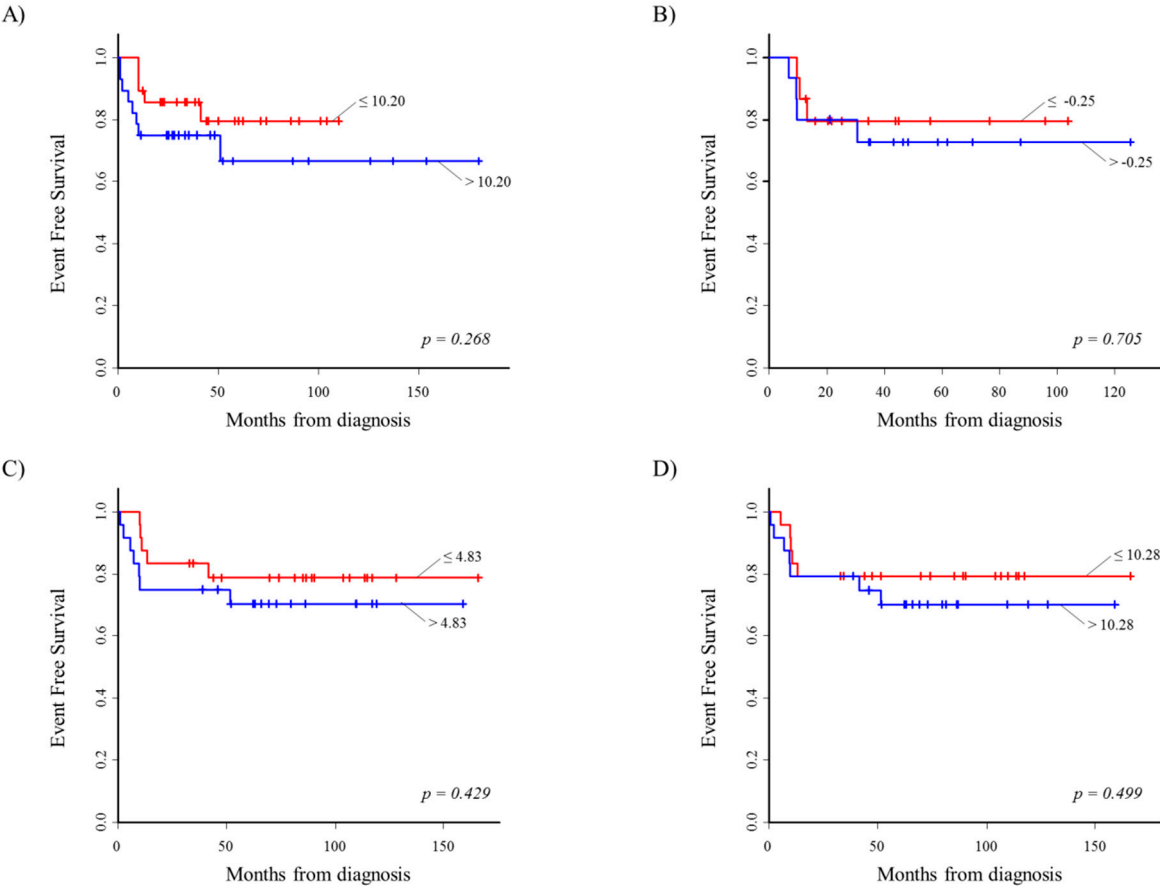

**Figure S10.** Event Free Survival of Stage 4s Neuroblastoma patients in relation to the expression of *E2F1* gene in four microarray databases; cut-off value based on the first tertile of gene expression (red line: lower values; blue line: higher values).

Panel A: Kocak-649 data set; panel B: Oberthuer-251 data set; panel C: SEQC dataset, RPM platform; Panel D: SEQC data set, custom platform.

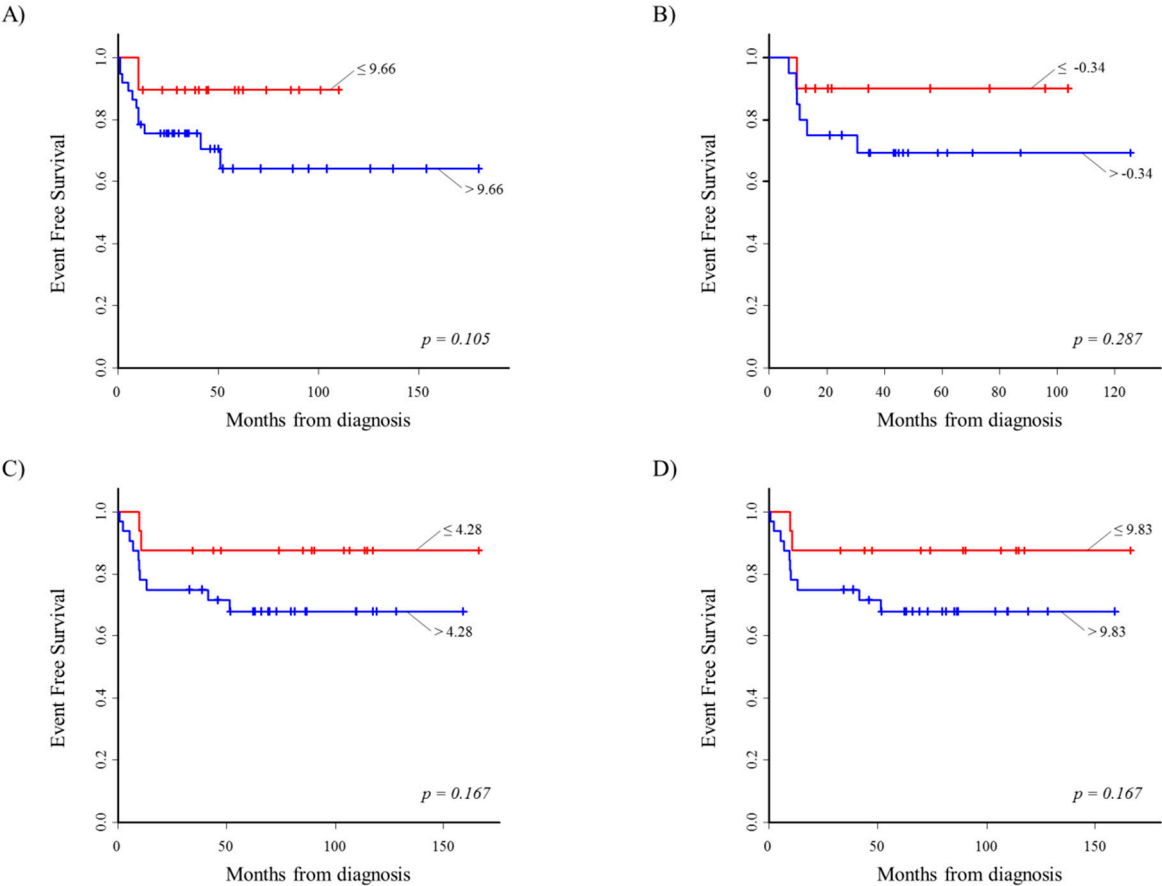

**Figure S11.** Event Free Survival of Stage 4S Neuroblastoma patients in relation to the expression of *E2F1* gene in four microarray databases; cut-off value based on the last tertile of gene expression (red line: lower values; blue line: higher values).

Panel A: Kocak-649 data set; panel B: Oberthuer-251 data set; panel C: SEQC dataset, RPM platform; Panel D: SEQC data set, custom platform.

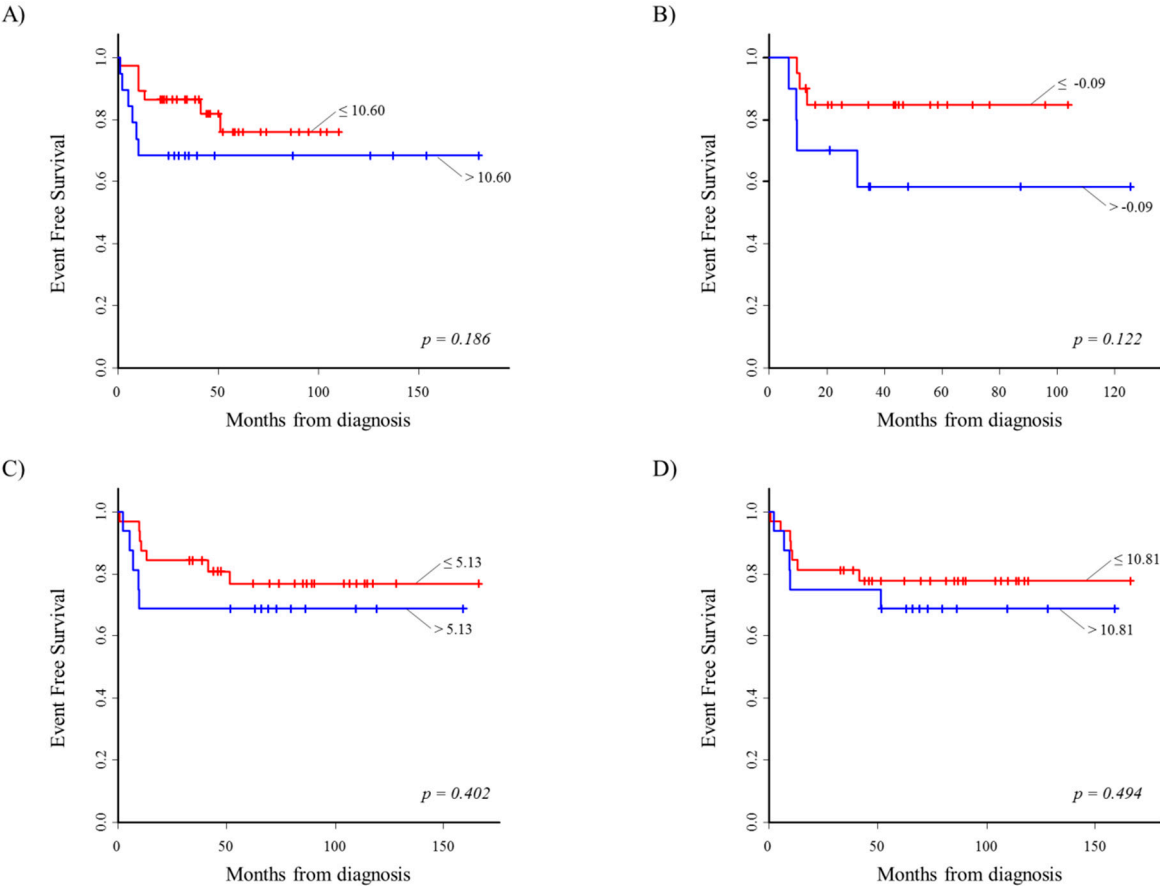

**Figure S12.** Forest plot of hazard ratios for the association between Event Free Survival of patients with Stage 4S Neuroblastoma and *E2F1* gene expression at the following selected cut-offs: A) first tertile; B) median; C) last tertile.

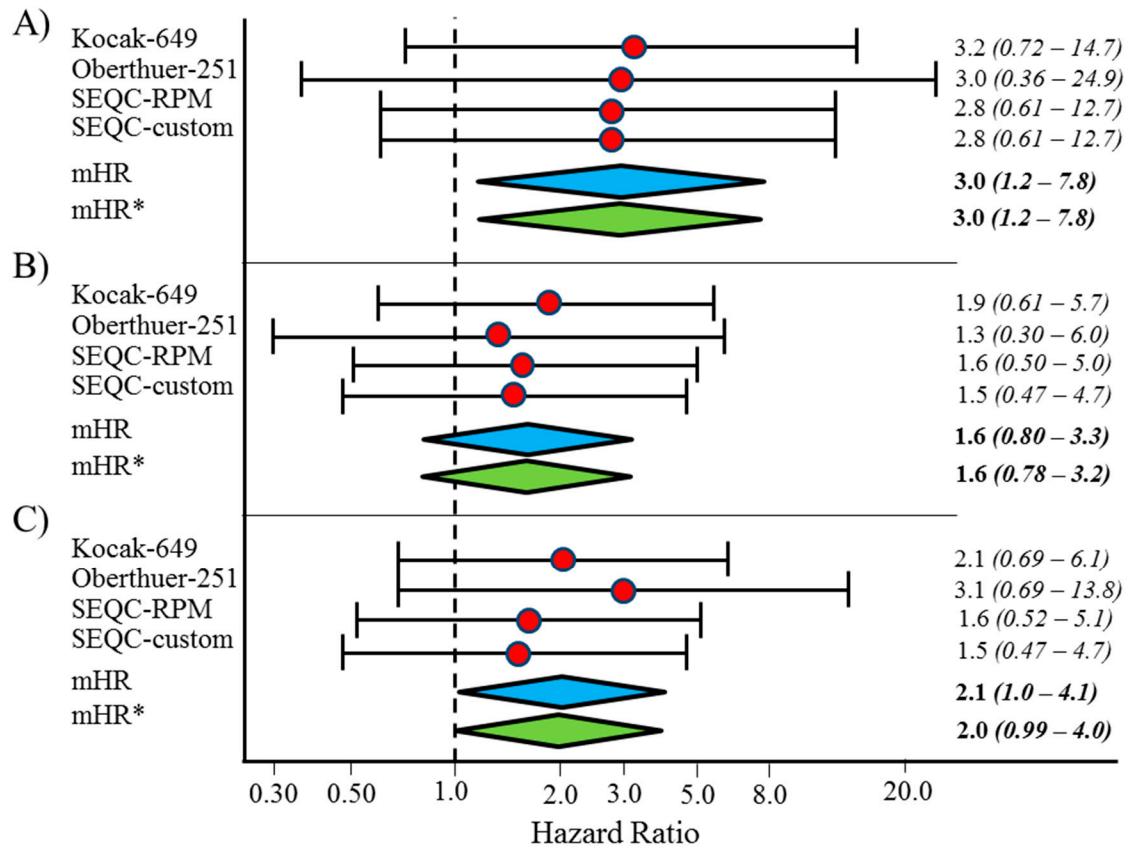

mHR: meta-analytic random effect estimates of Hazard Ratio based on Kocak, Oberthuer and SEQC RPM data sets. mHR\*: meta-analytic random effect estimates of Hazard Ratio based on Kocak, Oberthuer and SEQC Custom data sets.

**Figure S13.** Event Free Survival of Stage 4S Neuroblastoma patients in relation to the expression of *E2F2* gene in four microarray databases; cut-off value based on the median of gene expression (red line: lower values; blue line: higher values).

Panel A: Kocak-649 data set; panel B: Oberthuer-251 data set; panel C: SEQC dataset, RPM platform; Panel D: SEQC data set, custom platform.

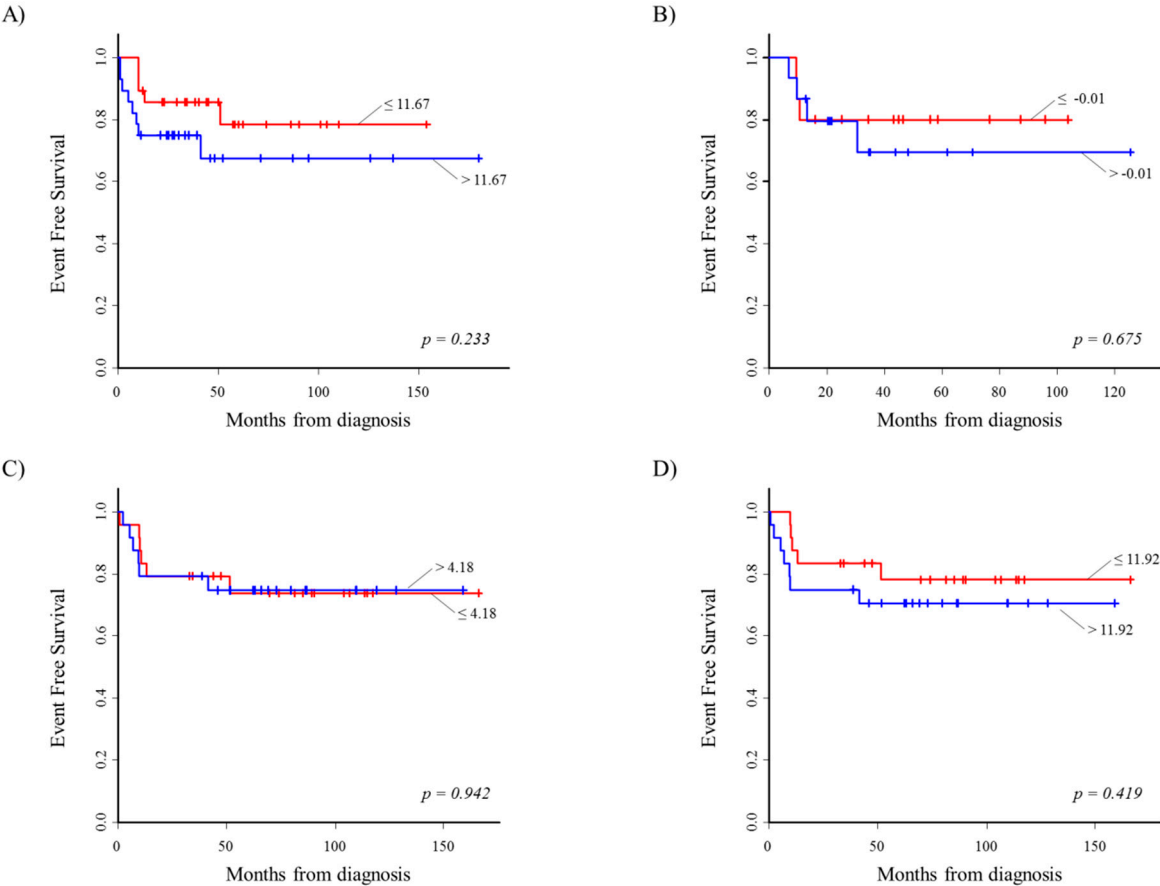

**Figure S14.** Event Free Survival of Stage 4S Neuroblastoma patients in relation to the expression of E2F2 gene in four microarray databases; cut-off value based on the first tertile of gene expression (red line: lower values; blue line: higher values).

Panel A: Kocak-649 data set; panel B: Oberthuer-251 data set; panel C: SEQC dataset, RPM platform; Panel D: SEQC data set, custom platform.

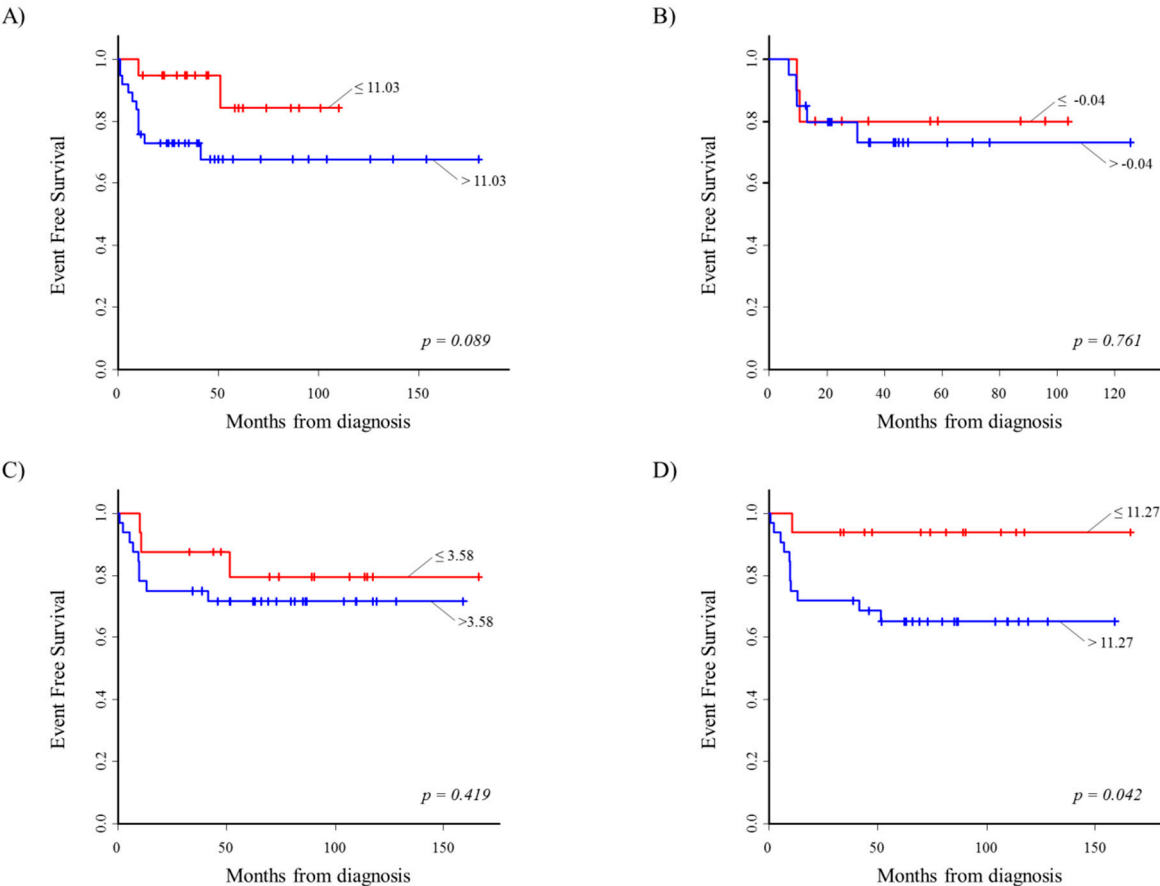

**Figure S15.** Event Free Survival of Stage 4S Neuroblastoma patients in relation to the expression of *E2F2* gene in four microarray databases; cut-off value based on the last tertile of gene expression (red line: lower values; blue line: higher values).

Panel A: Kocak-649 data set; panel B: Oberthuer-251 data set; panel C: SEQC dataset, RPM platform; Panel D: SEQC data set, custom platform.

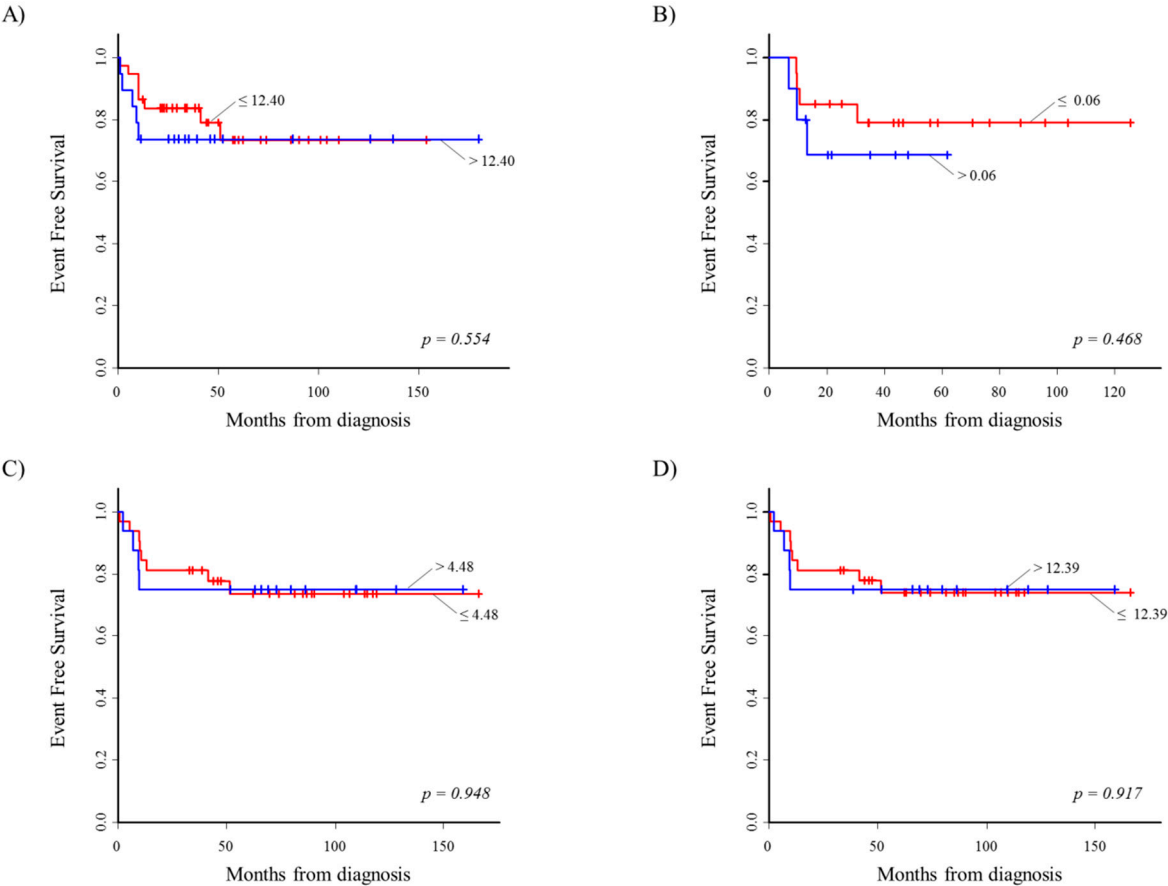

**Figure S16.** Forest plot of hazard ratios for the association between Event Free Survival of patients with Stage 4S Neuroblastoma and *E2F2* gene expression at the following selected cut-offs: A) first tertile; B) median; C) last tertile.

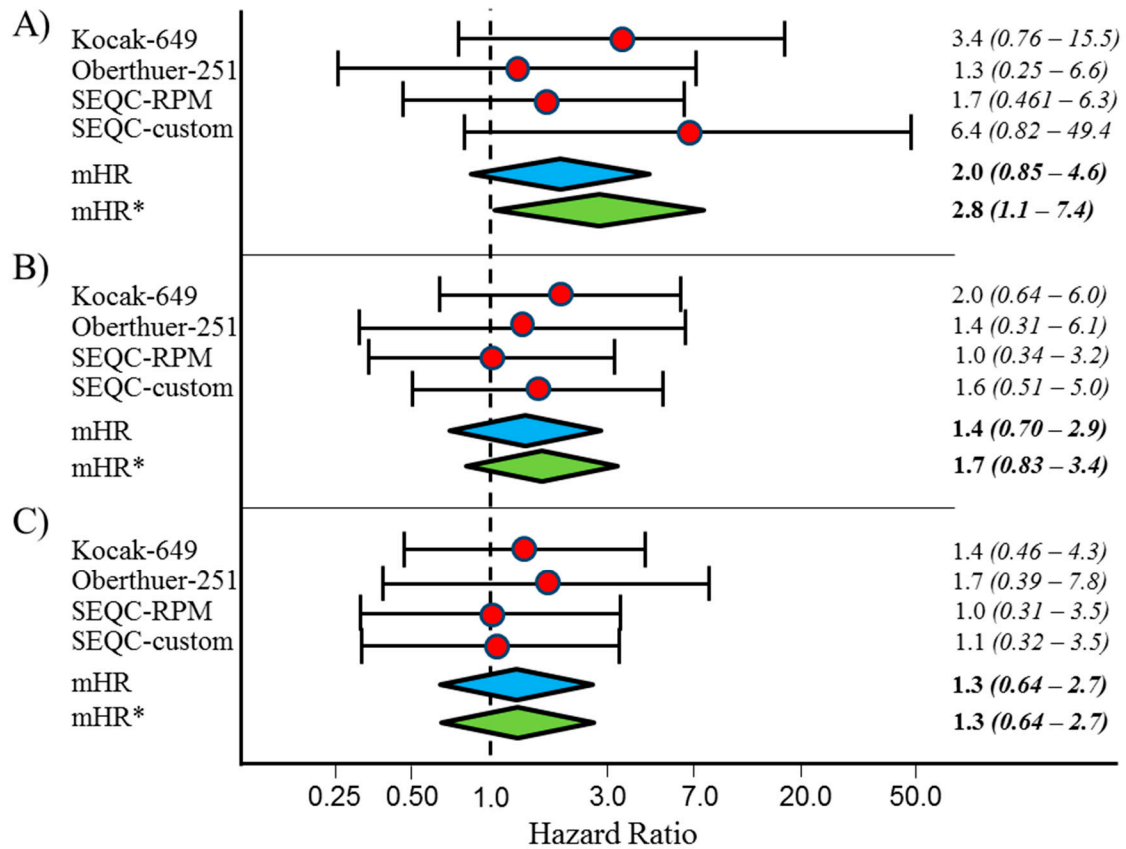

mHR: meta-analytic random effect estimates of Hazard Ratio based on Kocak, Oberthuer and SEQC RPM data sets. mHR\*: meta-analytic random effect estimates of Hazard Ratio based on Kocak, Oberthuer and SEQC Custom data sets.

**Figure S17.** Event Free Survival of Stage 4S Neuroblastoma patients in relation to the expression of *E2F3* gene in four microarray databases; cut-off value based on the median of gene expression (red line: lower values; blue line: higher values).

Panel A: Kocak-649 data set; panel B: Oberthuer-251 data set; panel C: SEQC dataset, RPM platform; Panel D: SEQC data set, custom platform.

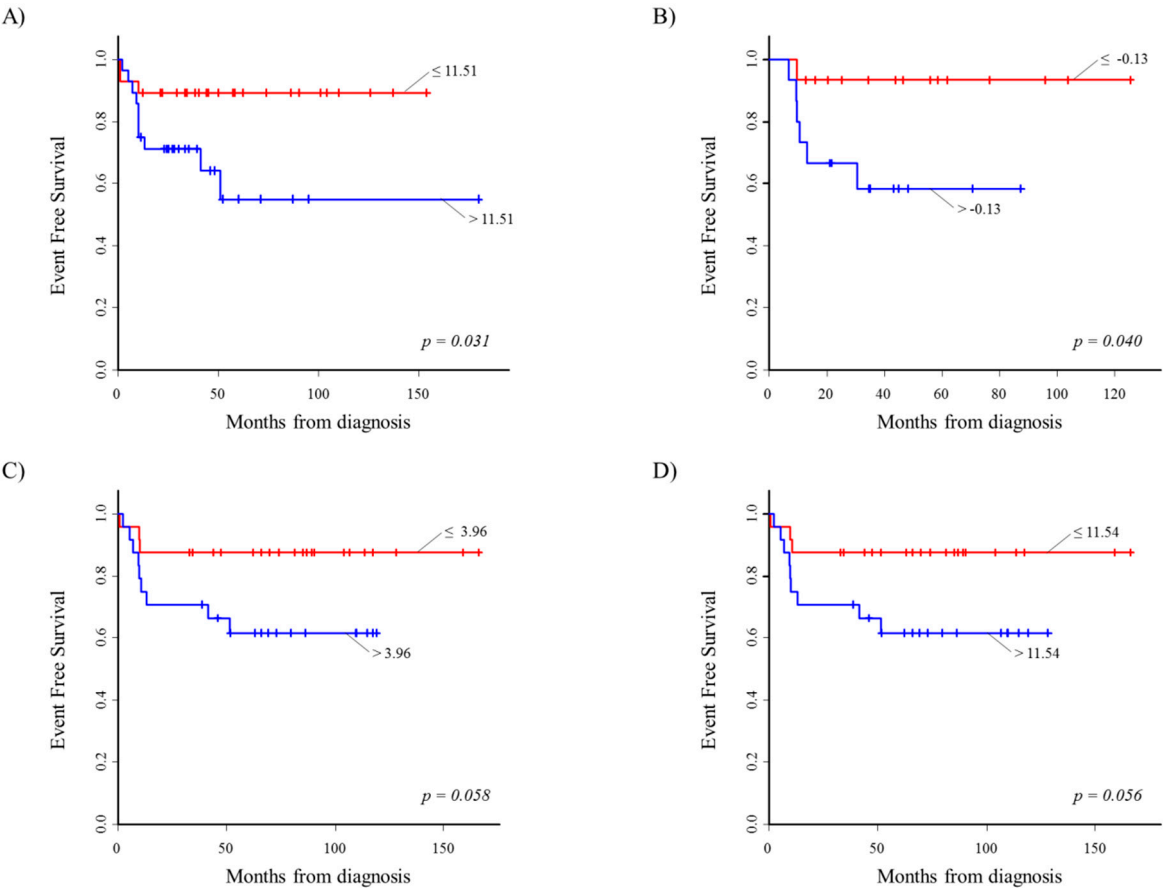

**Figure S18.** Event Free Survival of Stage 4S Neuroblastoma patients in relation to the expression of *E2F3* gene in four microarray databases; cut-off value based on the first tertile of gene expression (red line: lower values; blue line: higher values).

Panel A: Kocak-649 data set; panel B: Oberthuer-251 data set; panel C: SEQC dataset, RPM platform; Panel D: SEQC data set, custom platform.

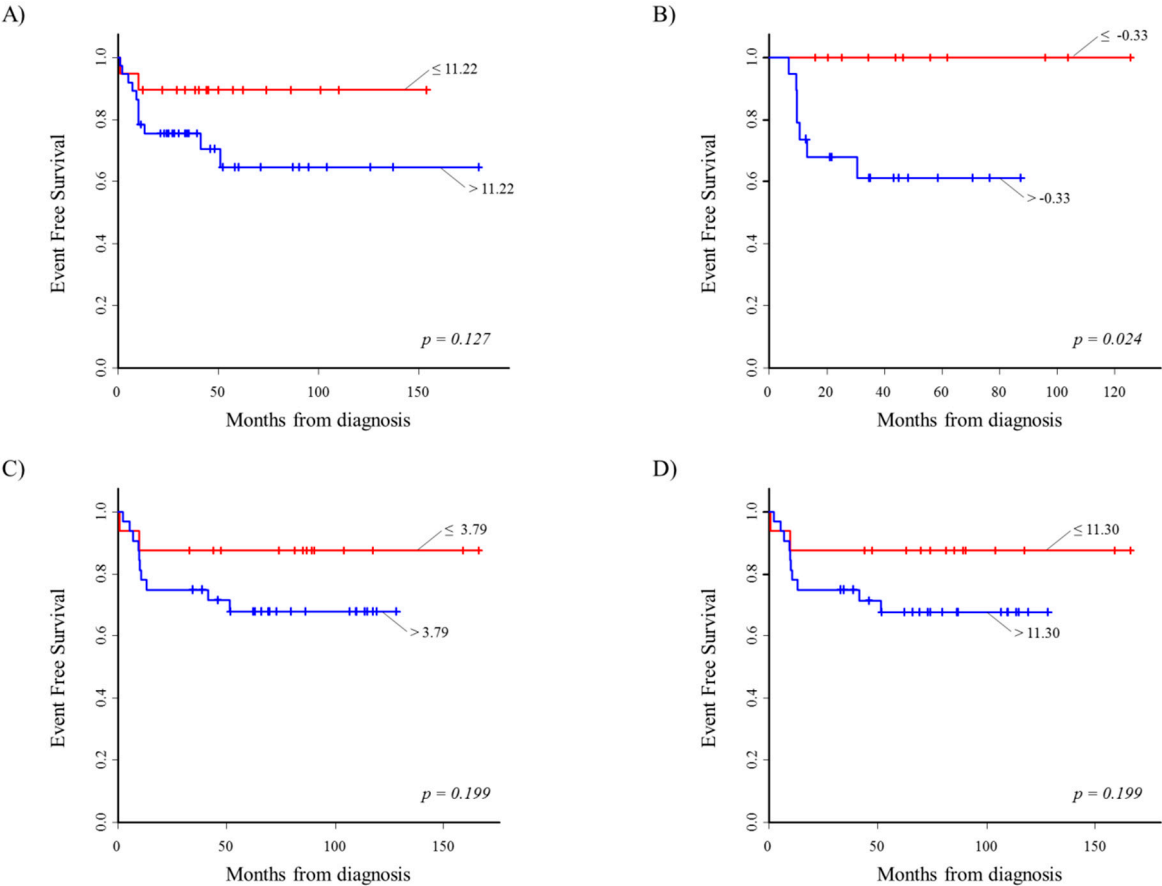

**Figure S19.** Event Free Survival of Stage 4S Neuroblastoma patients in relation to the expression of *E2F3* gene in four microarray databases; cut-off value based on the last tertile of gene expression (red line: lower values; blue line: higher values).

Panel A: Koca-649 data set; panel B: Oberthuer-251 data set; panel C: SEQC dataset, RPM platform; Panel D: SEQC data set, custom platform.

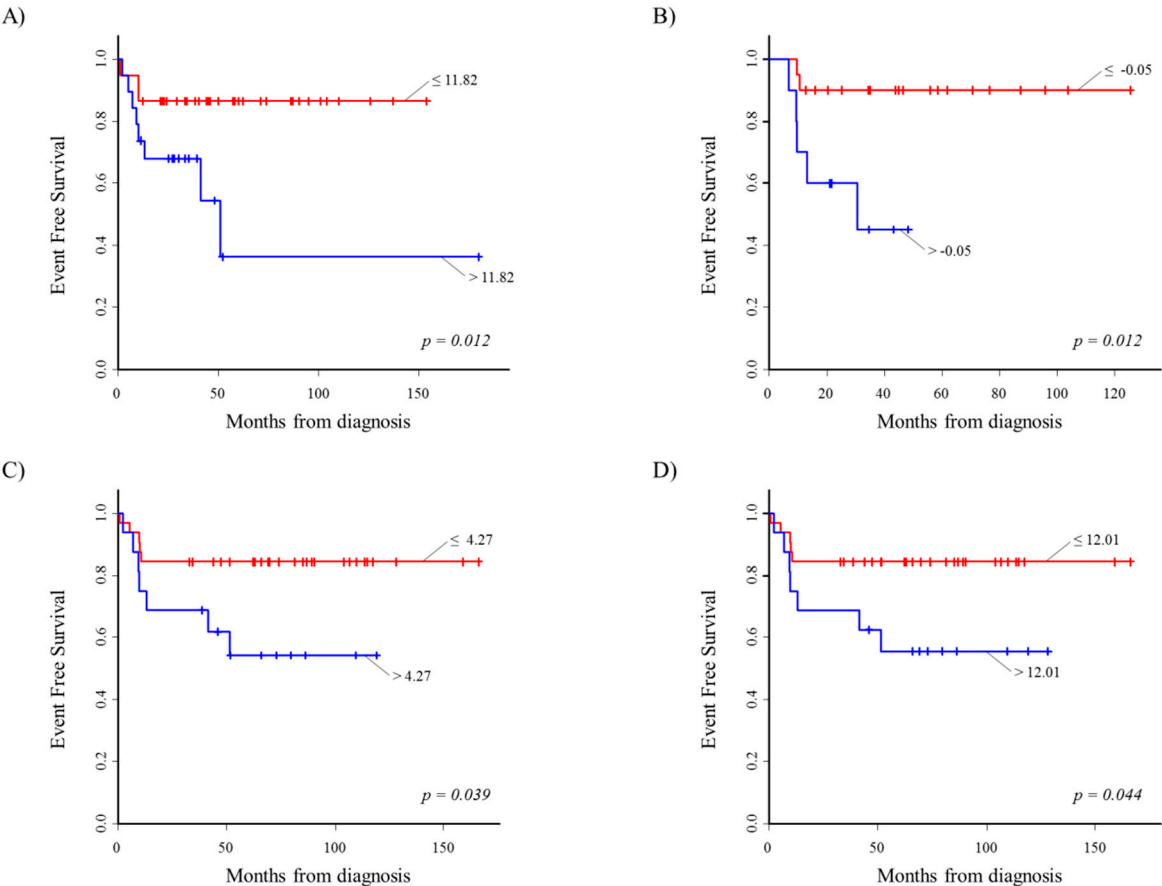

**Figure S20.** Forest plot of hazard ratios for the association between Event Free Survival of patients with Stage 4S Neuroblastoma and *E2F3* gene expression at the following selected cut-offs: A) first tertile; B) median; C) last tertile.

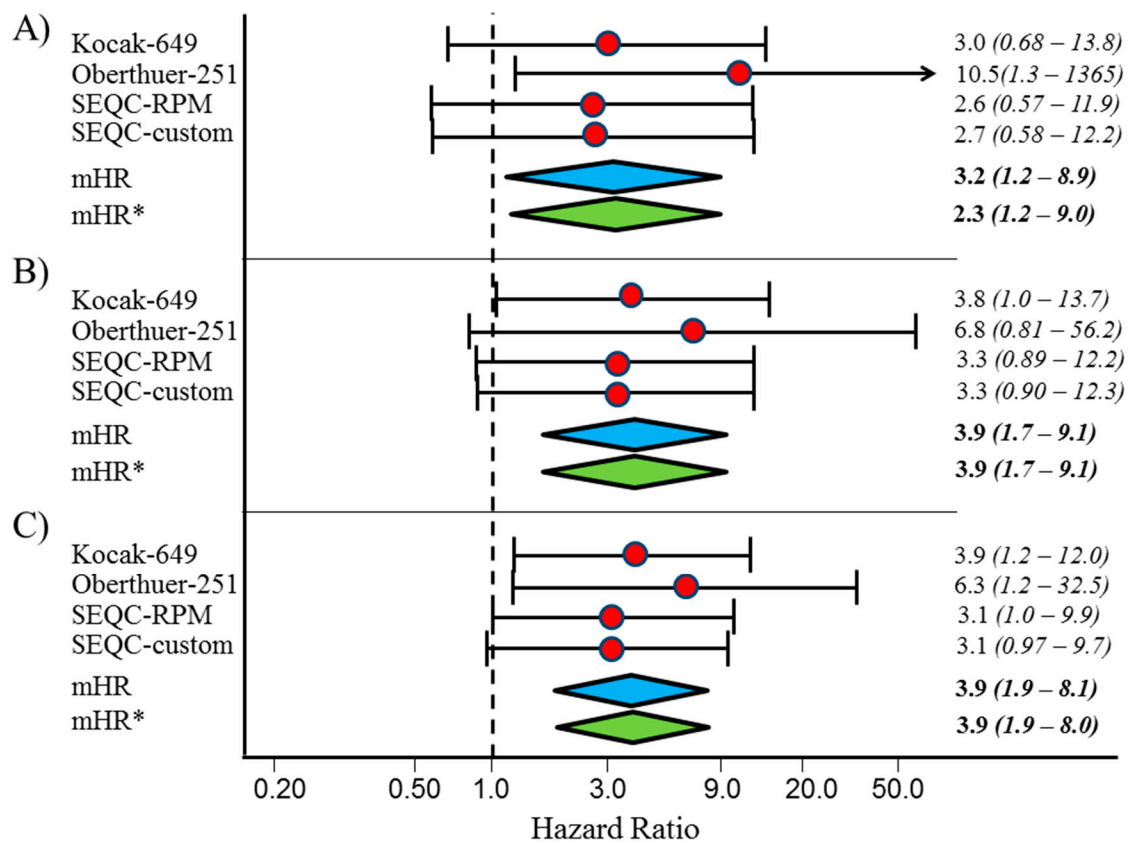

mHR: meta-analytic random effect estimates of Hazard Ratio based on Kocak, Oberthuer and SEQC RPM data sets. mHR\*: meta-analytic random effect estimates of Hazard Ratio based on Kocak, Oberthuer and SEQC Custom data sets.

**Table S1. Analysis of E2F3 protein in 38 primary neuroblastoma tissue sections.**

| Patient | Stage | Protocol | MYCN amplified | Relapse | Relapse site           | E2F3 <sup>+</sup> cells (%) |
|---------|-------|----------|----------------|---------|------------------------|-----------------------------|
| NB1     | 4S    | Infant   | N              | N       | -                      | 3                           |
| NB2     | 4S    | Infant   | N              | N       | -                      | 5                           |
| NB3     | 4S    | Infant   | N              | N       | -                      | 6                           |
| NB4     | 4S    | Infant   | N              | N       | -                      | 18                          |
| NB5     | 4S    | Infant   | N              | N       | -                      | 4                           |
| NB6     | 4S    | Infant   | N              | Y*      | bone marrow, liver     | 90                          |
| NB7     | 4S    | Infant   | N              | Y*      | lung                   | 80                          |
| NB8     | 4S    | Infant   | N              | N       | -                      | 16                          |
| NB9     | 4S    | Infant   | N              | N       | -                      | 2                           |
| NB10    | 4S    | Infant   | N              | N       | -                      | 10                          |
| NB11    | 4S    | Infant   | N              | N       | -                      | 8                           |
| NB12    | 4S    | Infant   | N              | Y       | metastatic             | 87                          |
| NB13    | 4S    | Infant   | N              | Y       | distant and local      | 90                          |
| NB14    | 4S    | Infant   | N              | N       |                        | 5                           |
| NB15    | 4S    | Infant   | N              | N       |                        | 4                           |
| NB16    | 4S    | Infant   | N              | N       |                        | 11                          |
| NB17    | 4S    | Infant   | N              | N       |                        | 3                           |
| NB18    | 4S    | Infant   | N              | N       |                        | 6                           |
| NB19    | 4S    | Infant   | N              | N       |                        | 14                          |
| NB20    | 4S    | Infant   | N              | N       |                        | 7                           |
| NB21    | 4S    | Infant   | N              | N       |                        | 5                           |
| NB22    | 4S    | Infant   | N              | N       |                        | 4                           |
| NB23    | 4S    | Infant   | N              | N       |                        | 9                           |
| NB24    | 4S    | Infant   | N              | Y       | metastatic             | 90                          |
| NB25    | 4S    | Infant   | N              | Y       | local                  | 80                          |
| NB26    | 4S    | Infant   | N              | Y       | metastatic             | 90                          |
| NB27    | 4S    | Infant   | N              | N       |                        | 12                          |
| NB28    | 4S    | Infant   | N              | N       |                        | 4                           |
| NB29    | 4S    | Infant   | N              | N       |                        | 7                           |
| NB30    | 4S    | Infant   | N              | N       |                        | 3                           |
| NB31    | 4S    | Infant   | N              | N       |                        | 8                           |
| NB32    | 4S    | Infant   | N              | Y       | metastatic             | 78                          |
| NB33    | 4S    | Infant   | N              | Y       | distant and local      | 90                          |
| NB34    | 4S    | Infant   | N              | Y*      | central nervous system | 80                          |
| NB35    | 4S    | Infant   | N              | Y       | metastatic             | 80                          |
| NB36    | 4S    | Infant   | N              | Y       | metastatic             | 90                          |
| NB37    | 4S    | Infant   | N              | Y       | distant and local      | 90                          |
| NB38    | 4S    | Infant   | N              | Y*      | bone marrow, bones     | 90                          |

Y= yes; N= not; \* tumor progression to high risk stage 4
